# Supplementary material for: CBT for depression: a pilot RCT comparing mobile phone vs. computer
Source: Springer Nature journal article supplement (doi:10.1186/1471-244x-13-49), 2013-02-07

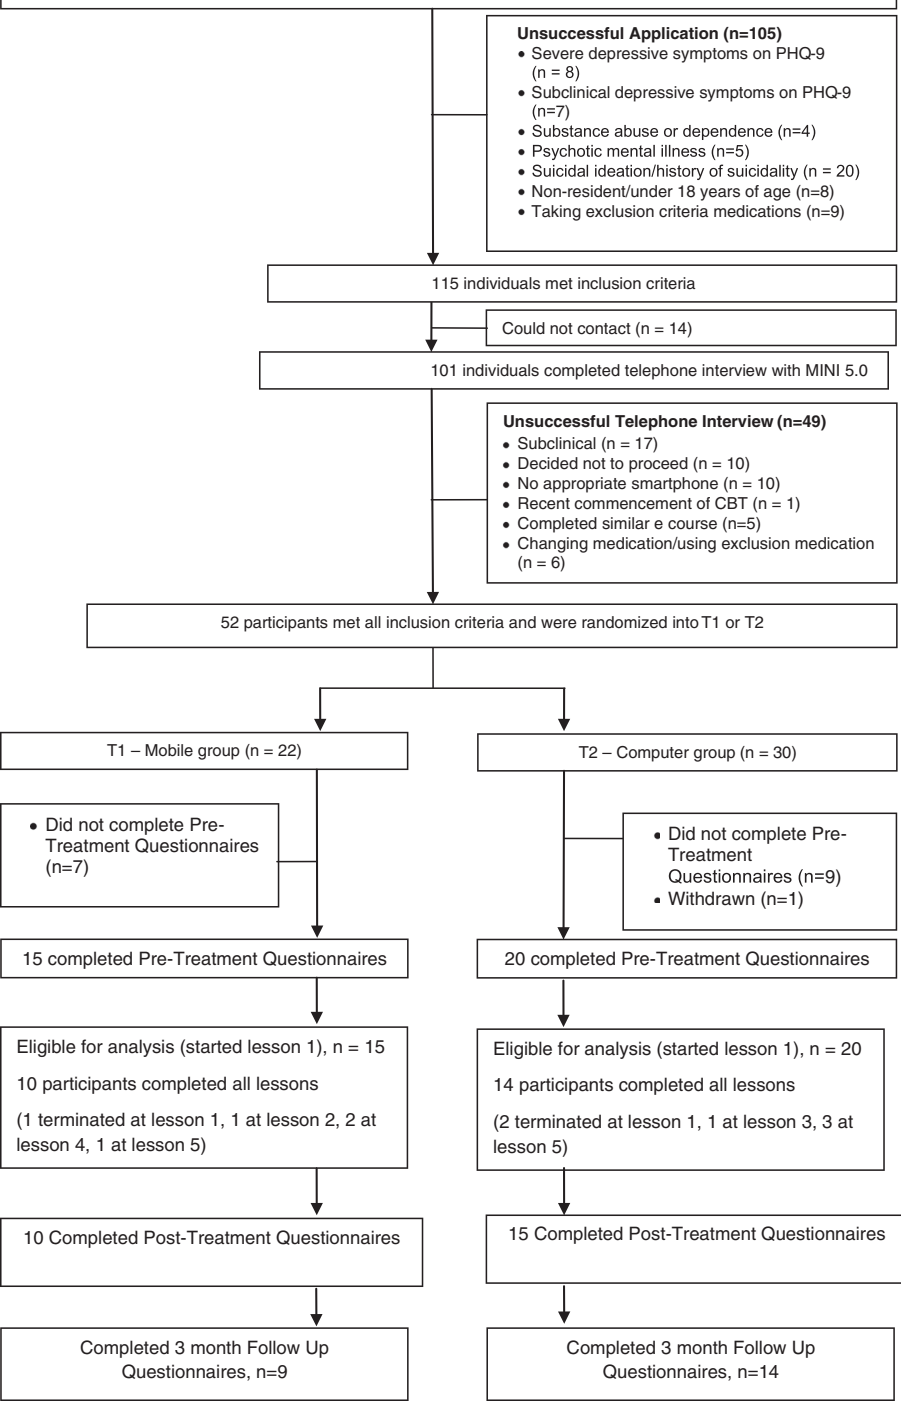

Supplement: 12888_2012_1212_MOESM1_ESM.pdf [file 12888_2012_1212_MOESM1_ESM.pdf]
